# Supplementary material
Source: publisher site journal article supplement (https://www.dovepress.com/article/232260)

**Supplement Figure 1.** (A) Western blot analysis for EVT1 protein expression in A549 cells that were transfected with empty vector, ETV1-overexpressing vector or ETV1-overexpressing vector combined with miR-1224-3p. (B) qRT-PCR analysis for circ-ZNF609 expression in A549 and SPC-A1 cells after transfection with circ-ZNF609-overexpressing vector.

**Supplement Figure 2.** (A) qRT-PCR analysis for ETV1 expression in si-NC, si-circ-ZNF609 or si-circ-ZNF609 plus miR-1224-3p inhibitor treated A549 and SPC-A1 cells. (B) Western blot analysis for EVT1 protein expression in si-NC, si-circ-ZNF609 or si-circ-ZNF609 plus miR-1224-3p inhibitor treated A549 and SPC-A1 cells. (C) The cell proliferation of si-NC, si-circ-ZNF609 or si-circ-ZNF609 plus miR-1224-3p inhibitor treated A549 and SPC-A1 cells for 24, 48, 72, 96 h. (D) Colony formation assay for si-NC, si-circ-ZNF609 or si-circ-ZNF609 plus miR-1224-3p inhibitor treated A549 and SPC-A1 cells. Values are expressed in mean ± SD. *******p*<0.01.


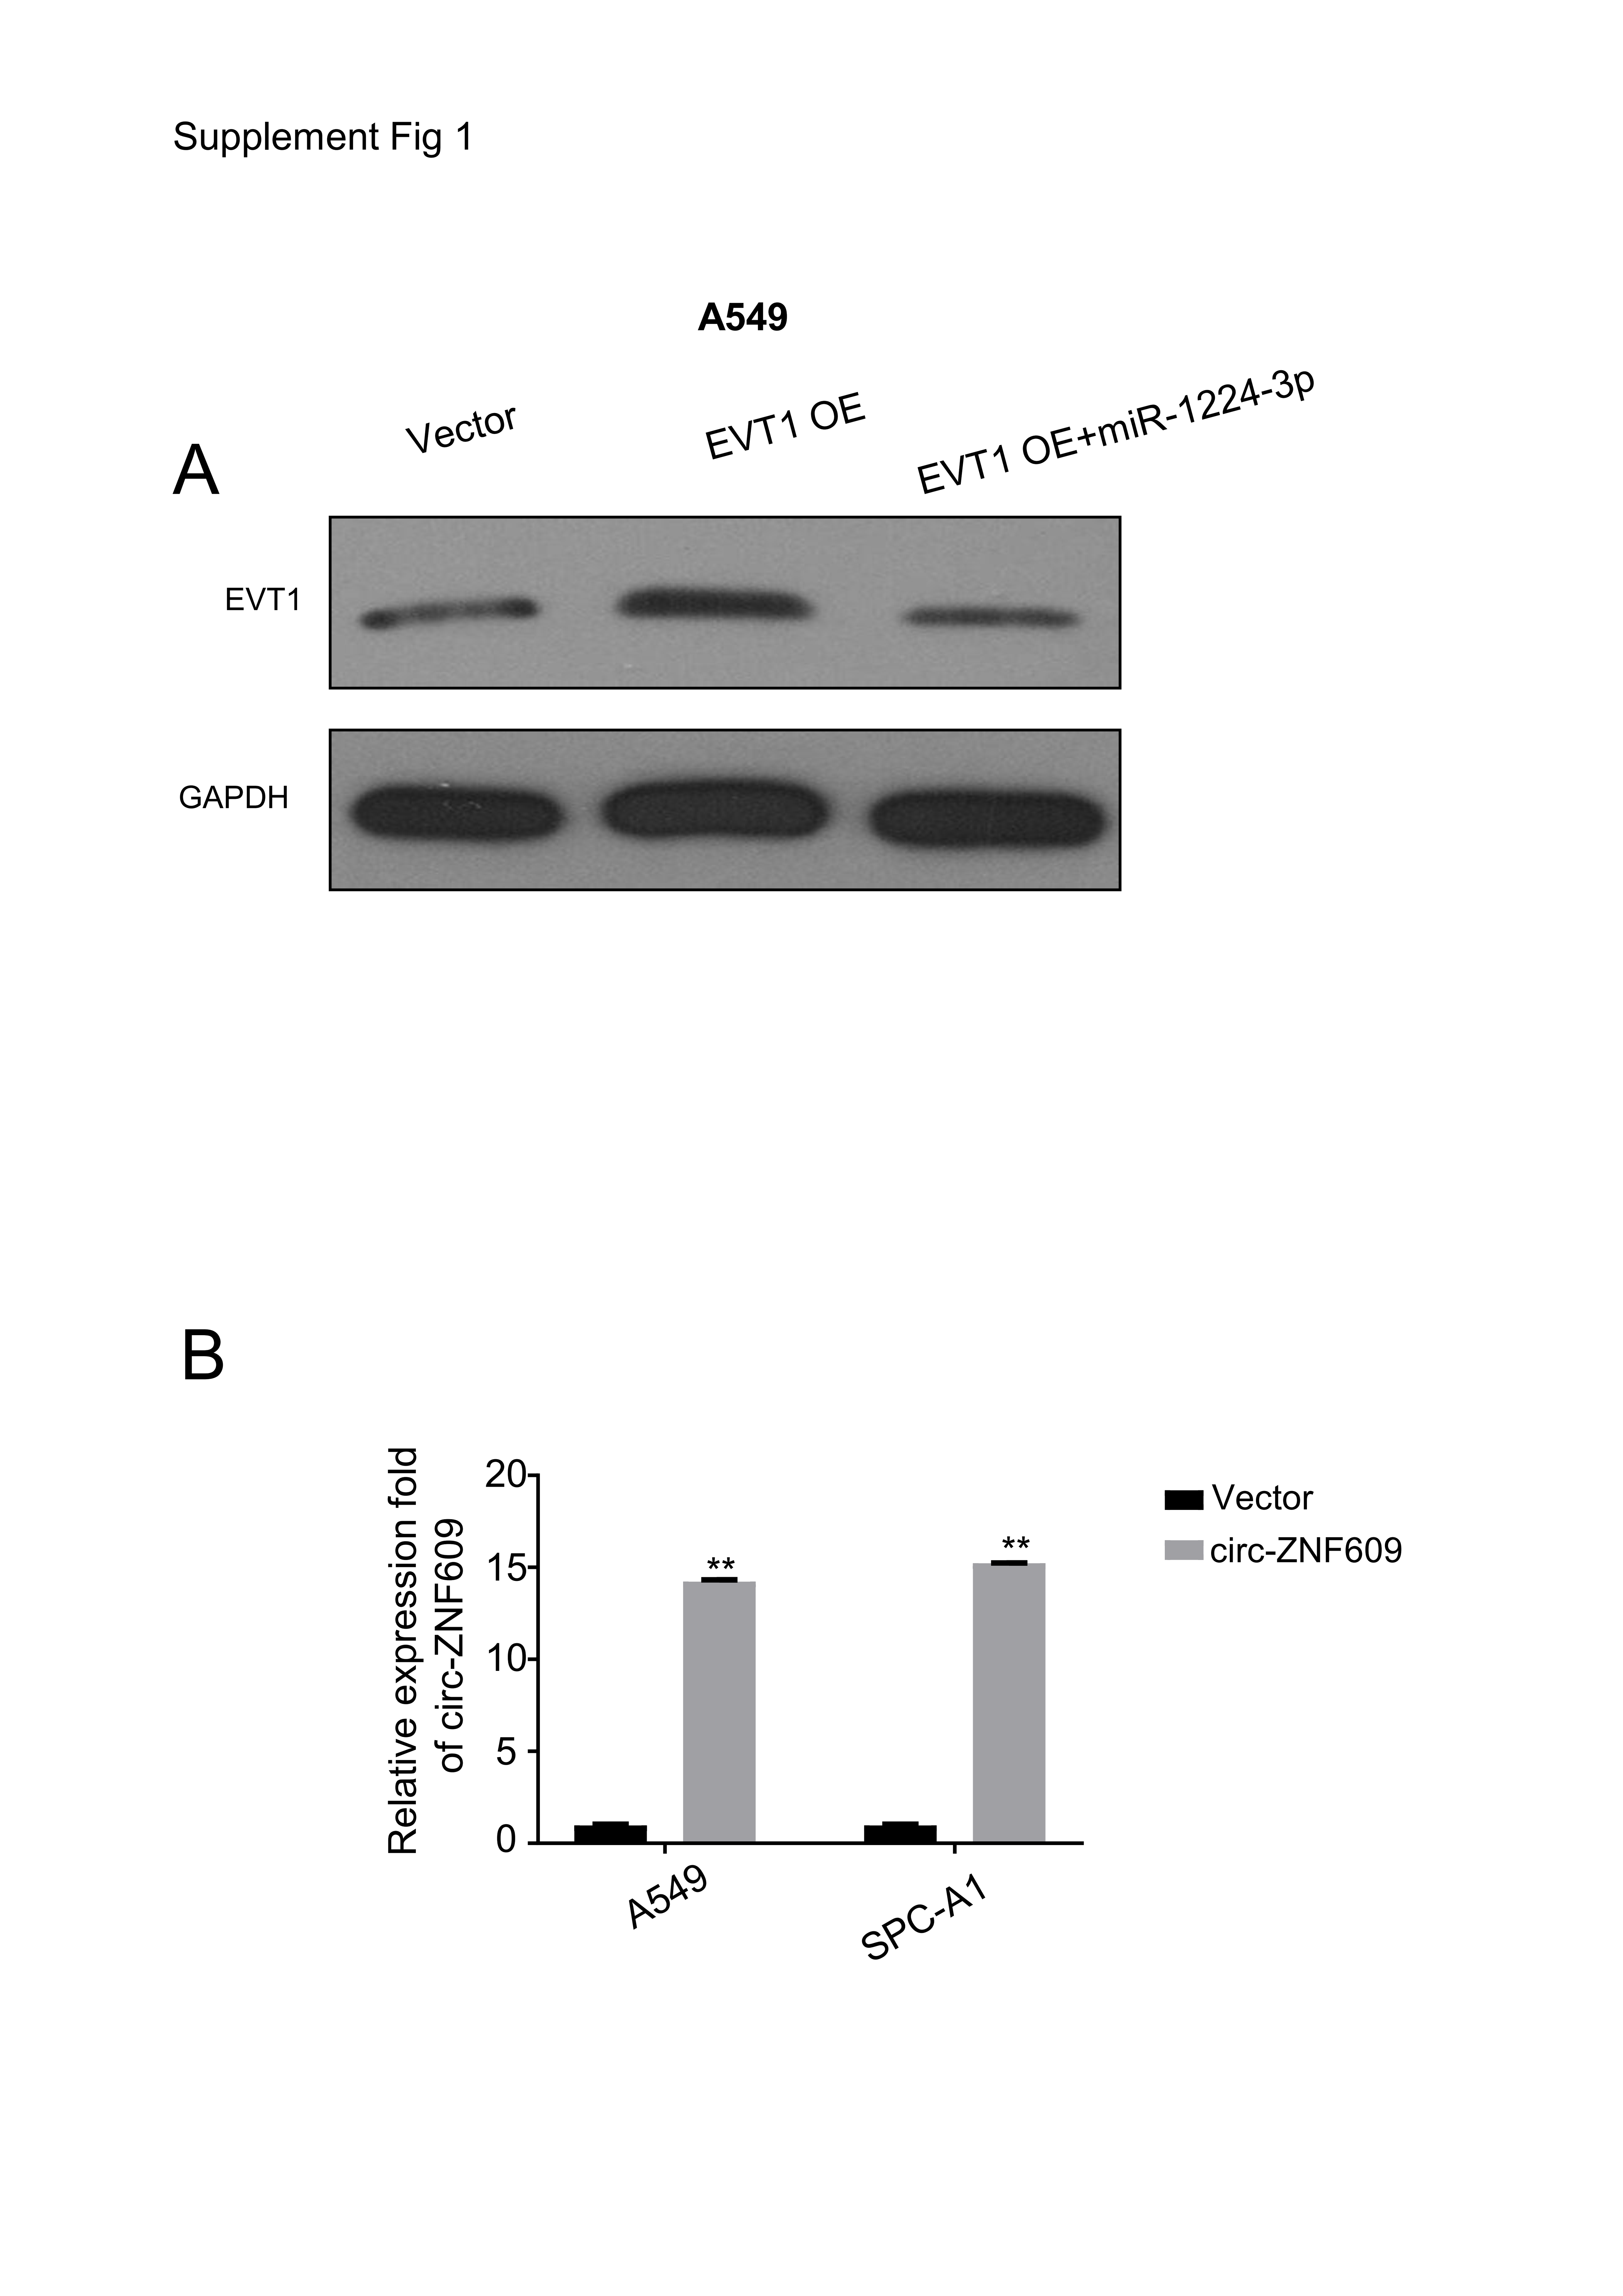


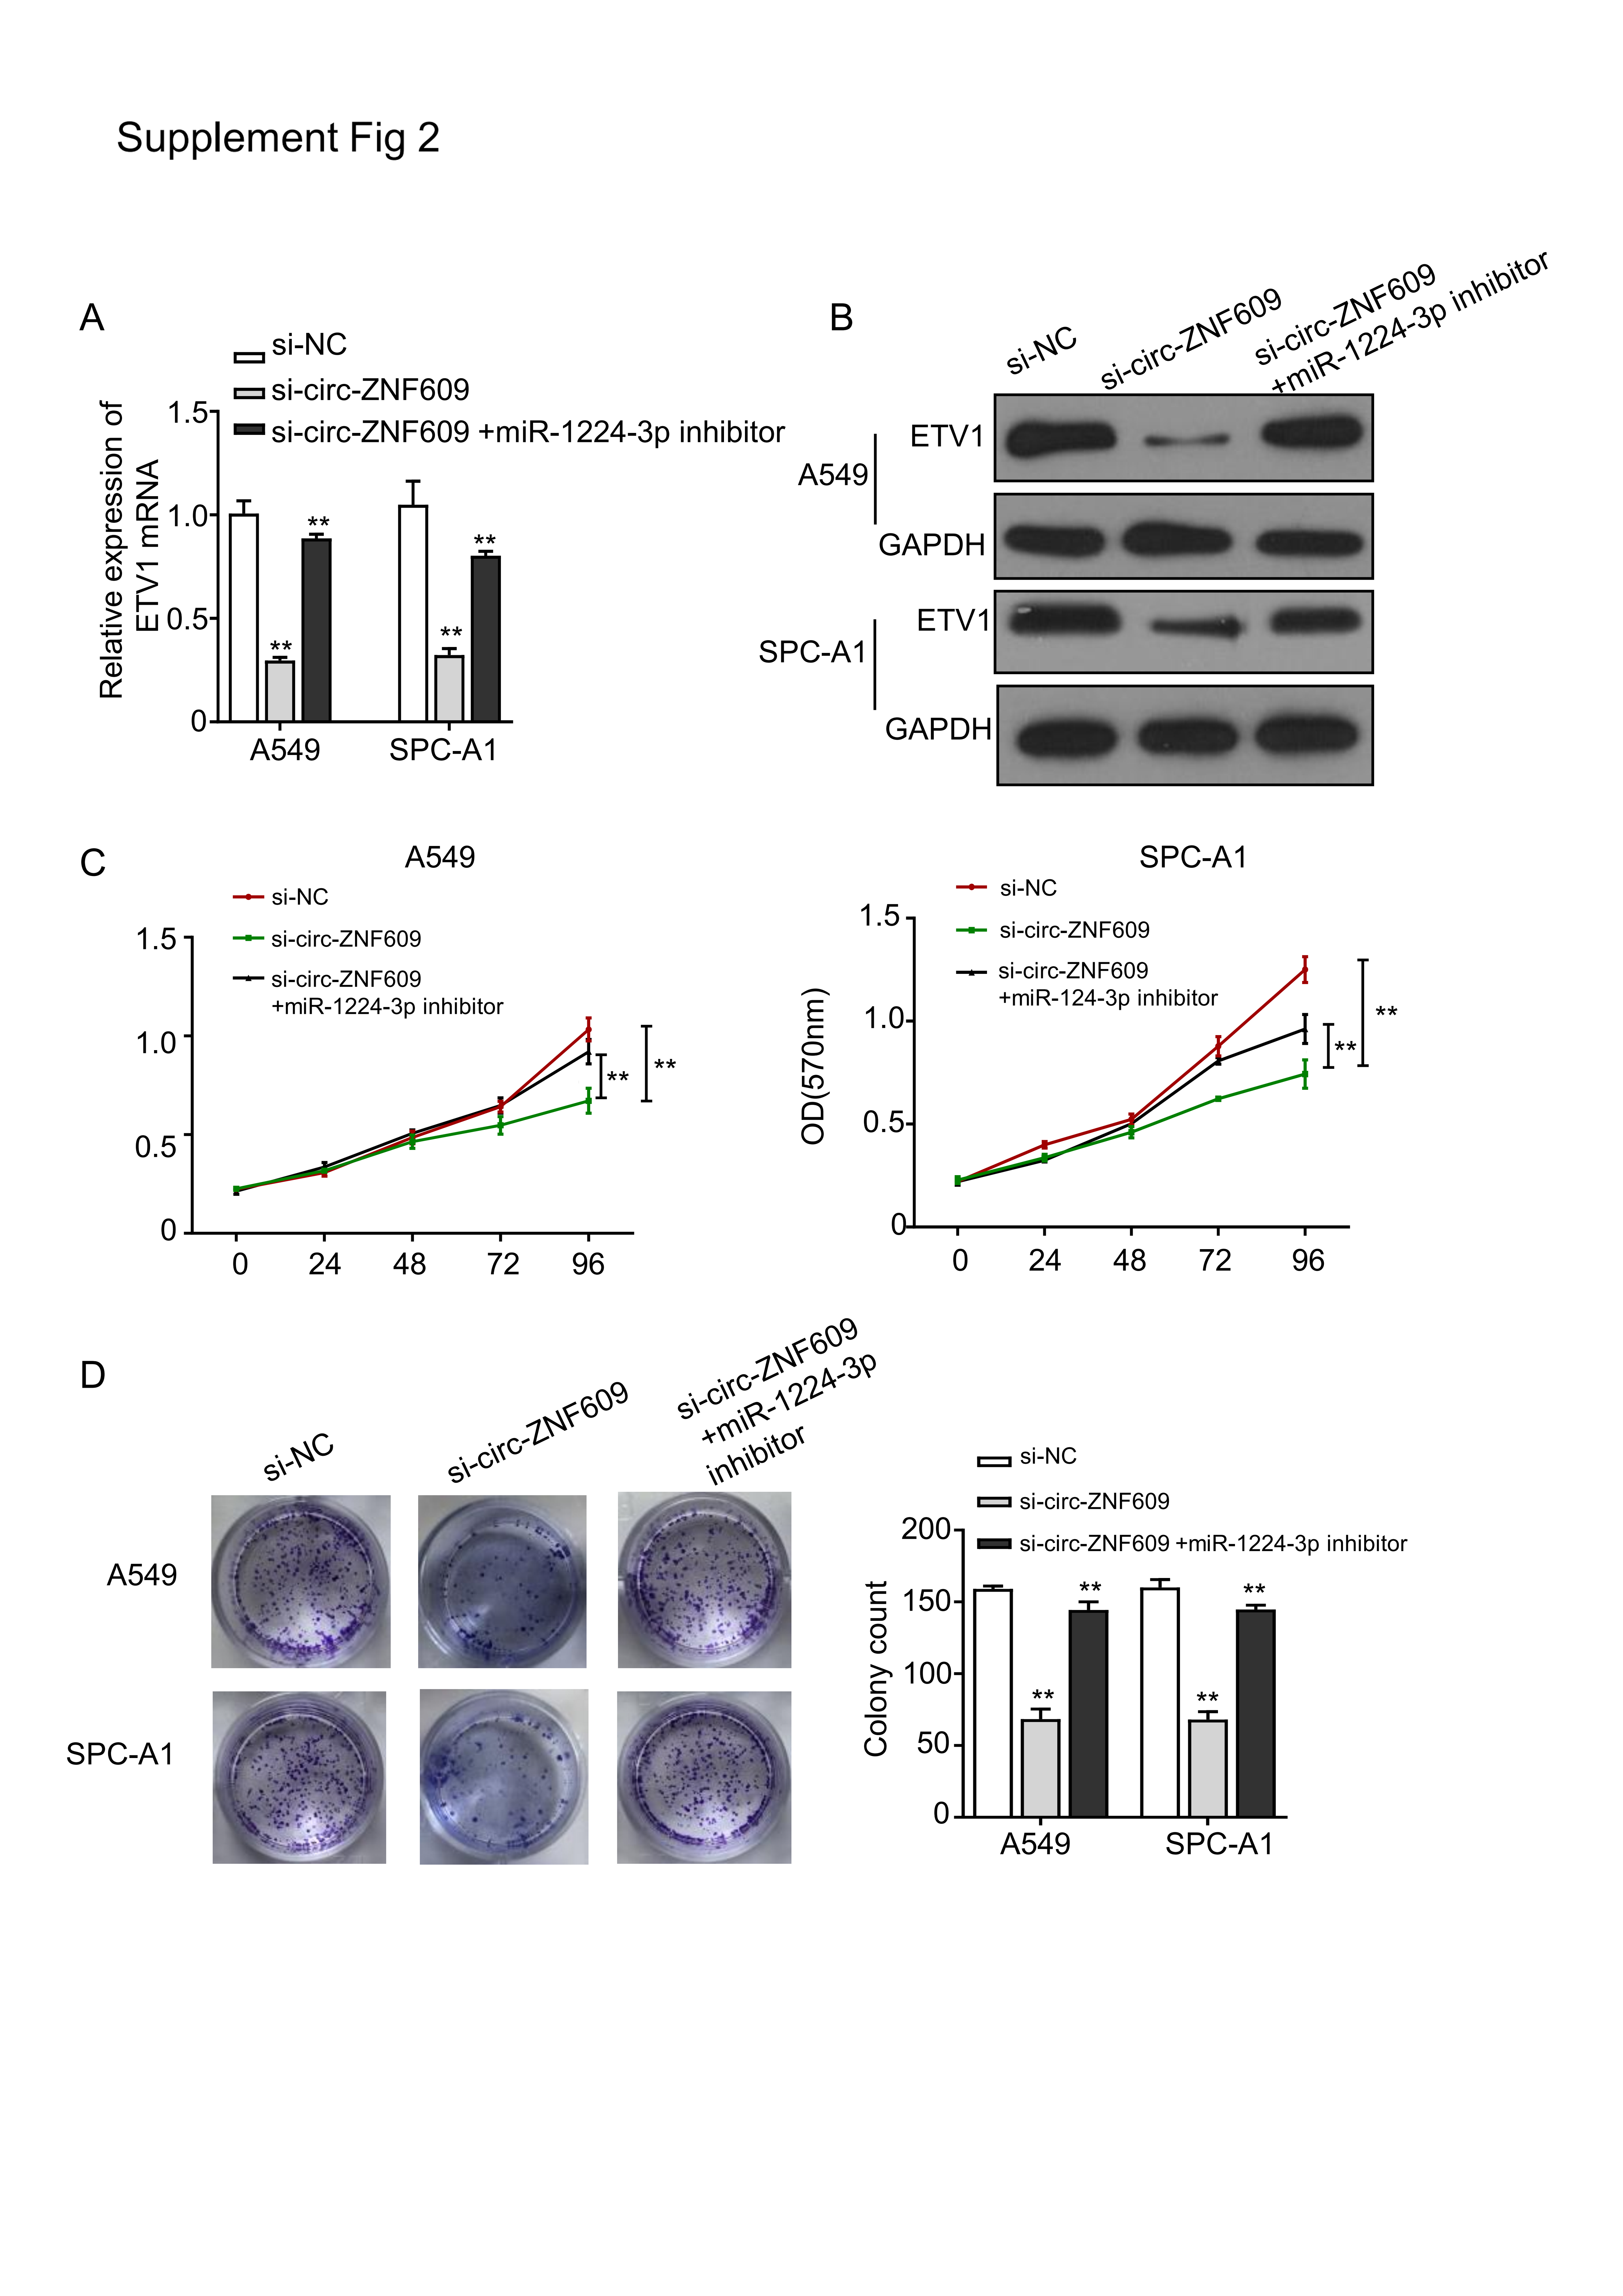

Supplement: Supplementary file 1 [file get_supplementary_file.php]
